# Supplementary material
Source: ML conference proceedings conference paper supplement (https://openaccess.thecvf.com/content/CVPR2025/html/Ho_DejaVid_Encoder-Agnostic_Learned_CVPR_2025_paper.html)
Supplement: Supplementary file 1 [file Ho_DejaVid_Encoder-Agnostic_Learned_CVPR_2025_supplemental.pdf]

# DejaVid: Encoder-Agnostic Learned Temporal Matching for Video Classification

## Supplementary Material

**Additional Implementation Details.** VideoMAE V2-g takes 16 frames of shape  $224 \times 224$  as input and outputs a length-1408 representation and then a length- $N_c$  logit vector, where  $N_c$  is the number of classes in the dataset. Thus the size of the encoder output  $N_f$  is  $1408 + N_c$ . For DejaVid, we apply a temporal sliding window across the input video, take the center crop, and resize to  $224 \times 224$  to feed into the encoder. This gives us a TSE of shape  $T \times N_f$  for some  $T$ . Then, for each action class, we randomly sample 50 TSEs, reshape each of them to  $T_c \times N_f$  with linear interpolation, and then run 100 iterations of the DBA algorithm [23] to produce the centroid.

We now describe our choice of the temporal sliding window widths and strides. For Kinetics-400 and HMDB51, given a video, VideoMAE V2 temporally segments the video into 5 clips of the same length and takes 3 crops at the left, center, and right to produce  $5 \times 3 = 15$  logit vectors, from which they then take the mean to produce the class prediction. Note that the temporal treatment is equivalent to a sliding window of width  $\frac{|vid|}{5}$  and stride  $\frac{|vid|}{5}$ , where  $|vid|$  is the video length. On the other hand, we only use the center crop, but deploy a sliding window of width  $\frac{|vid|}{5}$  and stride  $\frac{|vid|}{40}$ , so we produce  $(\frac{40}{5} \cdot (5 - 1) + 1) \times 1 = 33$  logit vectors per video, with the resulting TSE having dimension  $33 \times N_f$ .

For Something-Something V2, unlike the other two datasets, VideoMAE V2 does not temporally segment but instead performs a strided slice on the frames with a step of 2. This means that the encoder is finetuned to an input window width of  $|vid|$ , which complicates our sliding window application. The vast majority of Kinetics-400 videos are of length  $\sim 300$  frames, but videos in Something-Something V2 vary more in frame count, ranging from the teens to over a hundred, which means its encoder window width varies more too. In order to provide DejaVid with both constant-width and variable-width information, we apply four sliding windows with width  $\{16, 32, 64, |vid|\}$  and stride 1 in parallel, and thus obtain for each video a TSE of dimension  $|vid| \times (4 \cdot (1408 + N_c))$ . The average video length in Something-Something V2 is  $\sim 40$  frames, so on average, we produce  $\frac{4 \cdot 40}{33} = 4.8$  times more embeddings per video than for Kinetics-400 and HMDB51.

### Applying DejaVid to non-SOTA video encoders.

Our algorithm is model-agnostic and can be applied to other encoders. To demonstrate this, we apply DejaVid to other encoders that are not SOTA. The results, as presented, show a significant improvement. Here, we report as base-lines numbers that the code on Hugging Face achieves on

our machine rather than the numbers from the original papers, which are somewhat higher.

| Model                                                         | Dataset (Clips $\times$ Crops) | Accuracy without DejaVid | Accuracy with DejaVid |
|---------------------------------------------------------------|--------------------------------|--------------------------|-----------------------|
| facebook/timesformer-base-finetuned-ssv2 @ huggingface [2, 6] | SSv2[16] (4 $ vid  \times 1$ ) | 55.5%                    | 57.6%                 |
| google/vivit-b-16x2-kinetics400 @ huggingface [3, 25]         | K400[18] (33 $\times$ 1)       | 62.4%                    | 66.6%                 |

### Formulas for loss gradients $\frac{\partial L_w}{\partial U}$ and $\frac{\partial L_w}{\partial C}$ .

This section supplements Sec. 3.2 by proving the differentiability of the Algorithm 2 neural network of DejaVid, namely the detailed formulas for  $\frac{\partial L_w}{\partial U}$  and  $\frac{\partial L_w}{\partial C}$ , which are omitted at the end of Sec. 3.2.

Recall from the end of Sec. 3.1 that we calculate the time-weighted distance from a training or validation TSE  $m$  to the centroid TSE  $C_i$  of each class  $i$  and then feed the class-wise distances to soft-min for class prediction. We first observe that before the soft-min, the distance calculations for each class are independent of each other; they do not share any elements of  $C$  or  $U$ , nor do they have any inter-class connections. So we can individually calculate  $\frac{\partial L_w}{\partial U[c]}$  and  $\frac{\partial L_w}{\partial C[c]}$  for each class  $c$ , then stack them together for the final  $\frac{\partial L_w}{\partial U}$  and  $\frac{\partial L_w}{\partial C}$ .

Note that  $\frac{\partial L_w}{\partial U[c]}$  and  $\frac{\partial L_w}{\partial C[c]}$  are the combination of three components:

$$\frac{\partial L_w}{\partial U[c]} = \frac{\partial L_w}{\partial D_w[c]} \sum_l \frac{\partial D_w[c]}{\partial SC[c, l]} \frac{\partial SC[c, l]}{\partial U[c]}$$

$$\frac{\partial L_w}{\partial C[c]} = \frac{\partial L_w}{\partial D_w[c]} \sum_l \frac{\partial D_w[c]}{\partial SC[c, l]} \frac{\partial SC[c, l]}{\partial C[c]}$$

where  $l$  is the index of the diagonal,  $D_w \in \mathbb{R}^{N_c}$  the distance from  $m$  to the centroid of each class,  $SC[c, l]$  is the  $l$ -th skip-connection for class  $c$  as in Algorithm 2, and  $C \in \mathbb{R}^{N_c \times T_c \times N_f}$ ,  $U \in \mathbb{R}_{>0}^{N_c \times T_c \times N_f}$  are as defined in Sec. 3.1. The following tackles each of the three components respectively.

For  $\frac{\partial L_w}{\partial D_w[c]}$ , we use the standard cross-entropy and soft-min, so the derivative is well-known to be:

$$\frac{\partial L_w}{\partial D_w[c]} = \mathbf{y}[c] - p[c]$$

where  $\mathbf{y}$  is the one-hot ground truth vector and  $p[c]$  is the predicted probability of class  $c$ .

For  $\frac{\partial D_w[c]}{\partial SC[c,l]}$ , the standard trick for calculating loss gradients of a min-pooling layer is to define an indicator matrix. Note that the  $l$ -th min-pooling layer for class  $c$  has length  $\|SC[c, l]\|$ . Let  $R[c, l]$  of shape  $\|SC[c, l]\| \times \|SC[c, l-1]\|$  be the indicator matrix of the  $i$ -th min-pooling for class  $c$ . We have:

$$R[c, l, a, b] = \begin{cases} 1 & \text{if } b \in \{a-1, a\} \text{ and} \\ & \text{the } a\text{-th output of the min-pooling} \\ & = \text{the } b\text{-th input of the min-pooling} \\ 0 & \text{otherwise} \end{cases}$$

And since the min-pooling layers are chained, we have:

$$\frac{\partial D_w[c]}{\partial SC[c, l]} = \prod_{i=n+m-2}^{l+1} R[c, i]$$

Notably,  $\|SC[c, n+m-2]\| = 1$ , so the matrix product results in a shape of  $\|SC[c, n+m-2]\| \times \|SC[c, l]\| = 1 \times \|SC[c, l]\|$ .

Finally, for  $\frac{\partial SC[c, l]}{\partial U[c]}$ , first notice that for any given  $i$ ,  $U[c, i]$  can only contribute to  $SC[c, l]$  at the entry with  $\text{dist}_w(U[c, i], C[c, i], m[l-i])$ . Denoting  $\frac{\partial SC[c, l]}{\partial U[c]}$  as  $dU_l[c] \in \mathbb{R}^{\|SC[c, l]\| \times T_c \times N_f}$ , we thus have:

$$dU_l[c, i, j, f] = \begin{cases} |C[c, i + \text{start}, f] - m[j, f]| \\ \text{if } i + \text{start} + j = l \\ 0 \text{ otherwise} \end{cases}$$

where  $\text{start} = \max(0, l - \dim_0(m) + 1)$  is the offset for the 0-th element of  $SC[c, l]$ , as in Line 6 of Algorithm 2.

Similarly for  $\frac{\partial SC[c, l]}{\partial C[c]}$ , first notice that for any given  $i$ ,  $C[c, i]$  can only contribute to  $SC[c, l]$  at the entry with  $\text{dist}_w(U[c, i], C[c, i], m[l-i])$ . Denoting  $\frac{\partial SC[c, l]}{\partial C[c]}$  as  $dC_l[c] \in \mathbb{R}^{\|SC[c, l]\| \times T_c \times N_f}$ , we thus have:

$$dC_l[c, i, j, f] = \begin{cases} U[c, i + \text{start}, f] \cdot \text{sign}(C[c, i + \text{start}, f] - m[j, f]) \\ \text{if } i + \text{start} + j = l \\ 0 \text{ otherwise} \end{cases}$$

which concludes the formulas for loss gradients  $\frac{\partial L_w}{\partial U}$  and  $\frac{\partial L_w}{\partial C}$ . This demonstrates the differentiability of the Algorithm 2 neural network of DejaVid, which enables optimization via backpropagation.
